# Supplementary material
Source: PubMed Central journal article supplement (PMC7235900)
Supplement: jamainternmed-180-962-s002.pdf [file jamainternmed-180-962-s002.pdf]

## Supplementary Online Content

Szilagyi PG, Albertin C, Casillas A, et al. Effect of patient portal reminders sent by a health care system on influenza vaccination rates: a randomized clinical trial. *JAMA Intern Med.* Published online May 18, 2020. doi:10.1001/jamainternmed.2020.1602

**eFigure.** Example of Emailed Patient Portal Reminder Letter

This supplementary material has been provided by the authors to give readers additional information about their work.

**eFigure.** Example of Emailed Patient Portal Reminder Letter

Name: XX

Letter Details

Dear [Patient Name],

Last year's flu season was severe and we are fast approaching the next flu season. To protect yourself, please come visit us soon to receive your flu vaccine.

The flu vaccine is safe.

While you may have heard that the vaccine does not always work, we know that getting vaccinated is the best way to protect you from getting sick, missing work or school, being hospitalized, or becoming disabled from a flu infection.

Because the flu can spread easily, it's important to get vaccinated before the flu virus arrives. Please get vaccinated to:

- Protect yourself
- Protect those you love, particularly pregnant women, young children, and the elderly.

Please call us to make an appointment or click here to request an appointment online. There are also other locations where you can get vaccinated, such as a pharmacy. Use our vaccine locator to find a site near you.

If you already got your flu vaccine outside of UCLA, please let us know by clicking here. This will allow us to coordinate your care so you receive the best treatment possible from our health system.

Learn more about the flu vaccine and how to protect you and your loved ones at: <https://www.XX>.

Thank you!  
XX, MD
