# Supplementary material
Source: PubMed Central journal article supplement (PMC7235900)
Supplement: jamainternmed-180-962-s003.pdf [file jamainternmed-180-962-s003.pdf]

## Data Sharing Statement

### Data

**Data available:** Yes

**Data types:** Other (please specify)

**Additional Information:** Summary de-identified data for total population, and also for any meaningful subgroups (e.g., children, adults 19-64, adults 65+, by race/ethnicity,. etc).

**How to access data:** How to access data: The datasets used and/or analyzed during the current study are available from the corresponding author on reasonable request. Please email Peter Szilagyi ([pszilagyi@mednet.ucla.edu](mailto:pszilagyi@mednet.ucla.edu)).

**When available:** With publication

### Supporting Documents

**Document types:** Statistical/analytic code

**How to access documents:** How to access this information: The datasets used and/or analyzed during the current study are available from the corresponding author on reasonable request. Please email Peter Szilagyi. NOTE-this trial did not require patient informed consent

**When available:** With publication

### Additional Information

**Who can access the data:** Anyone requesting the data for a reasonable reason

**Types of analyses:** For any reasonable purpose

**Mechanisms of data availability:** With investigator support
